# Supplementary material
Source: Research Square preprint supplement (doi:10.21203/rs.3.rs-9752032/v1)

# Hydrodynamic entropic potential generated by the spectral determinant

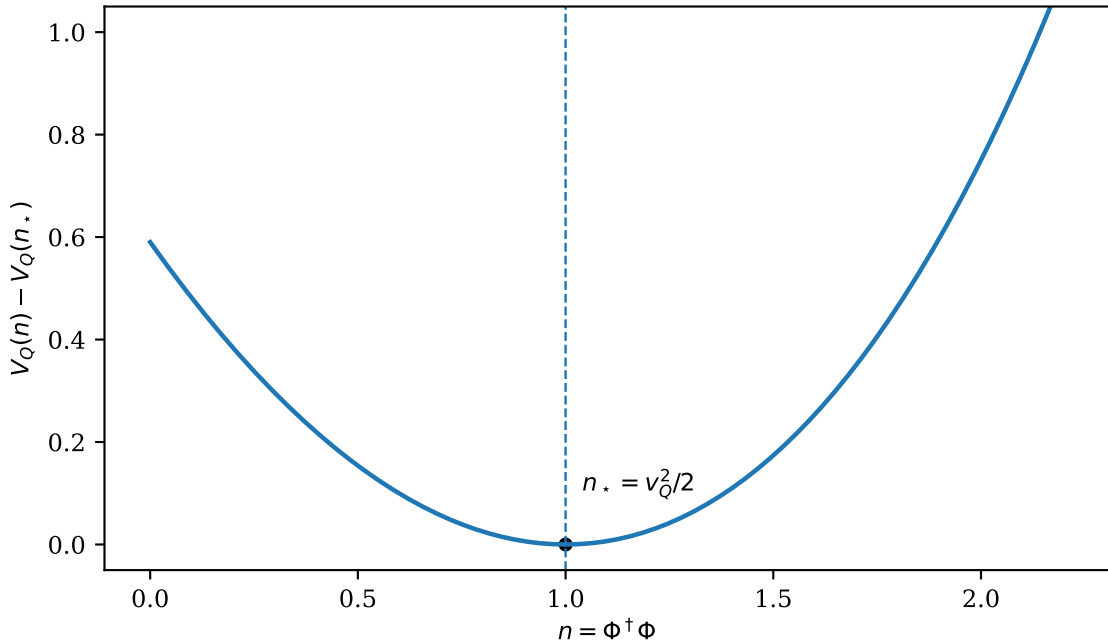

Supplement: Supplementary file 1 [file entropic_higgs_potential.pdf › supplement/data/entropic_higgs_potential.pdf]

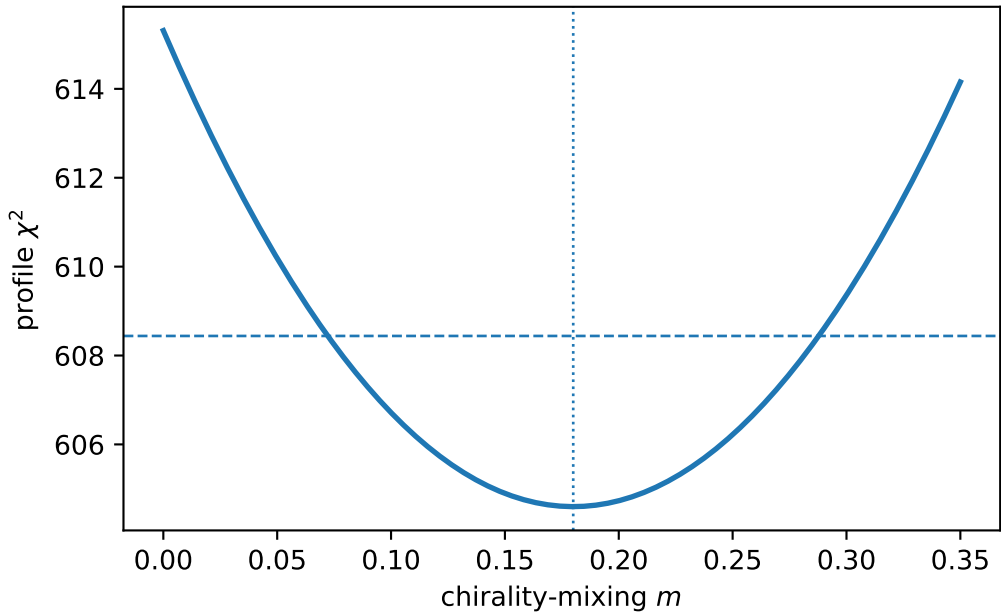

Supplement: Supplementary file 2 [file profile_likelihood_mass_scale.pdf › supplement/data/profile_likelihood_mass_scale.pdf]
